# Supplementary material
Source: PubMed Central journal article supplement (PMC8063130)

## Supplemental Online Content

Berkowitz ST, Groth SL, Gangaputra S, Patel S. Racial/ethnic disparities in ophthalmology clinical trials resulting in US Food and Drug Administration drug approvals from 2000 to 2020. *JAMA Ophthalmol*. Published online April 22, 2021. doi:10.1001/jamaophthalmol.2021.0857

**eMethods.** Trends in EID over time with regression analysis

**eTable.** Comparison of racial/ethnic composition of trials leading to drug approval with the expected trial demographic distribution in the US based on published 5-Category Race/ethnic prevalence data

**eFigure 1.** Enrollment Incidence Disparity (EID) and Enrollment Incidence Ratio (EIR) for each pharmaceutical agent relative to expected NEI prevalence rates.

**eFigure 2.** Enrollment Incidence Disparity (EID) and Enrollment Incidence Ratio (EIR) for each pharmaceutical agent relative to expected prevalence from Stein et al. 2011, Vanderbeek et al. 2011, and US Census data

This supplemental material has been provided by the authors to give readers additional information about their work.

## **eMethods: Trends in EID over time with regression analysis:**

### *Clinical Trials relative to NEI projections*

For AMD trials, the trial year was statistically significantly correlated with a decrease in EID for white race ( $F(1, 3) = 8.31, p = .063, R^2(\text{adj}) 64.62\%$ ), with no significant correlation for other race ( $F(1, 3) = 8.29, p = .064, R^2(\text{adj}) 64.56\%$ ), black race ( $F(1, 3) = 2.93, p = .19, R^2(\text{adj}) 32.53\%$ ) or Hispanic or LatinX ( $F(1, 3) = 6.55, p = .08, R^2(\text{adj}) 58.13\%$ ).

For glaucoma trials, the trial year was statistically significantly correlated with an increase in EID for Hispanic or LatinX ( $F(1, 4) = 25.79, p = .007, R^2(\text{adj}) 83.22\%$ ), decrease in EID for white race ( $F(1, 4) = 15.26, p = .02, R^2(\text{adj}) 74.04\%$ ) with no significant correlation for other race ( $F(1, 4) = 0.55, p = .50, R^2(\text{adj}) -0.0979$ ), or black race ( $F(1, 4) = 5.45, p = .08, R^2(\text{adj}) 47.08$ ).

### *Clinical Trials relative to literature (5-Category race data)*

For AMD trials, the trial year was statistically significantly correlated with an increase in EID for Asian race ( $F(1, 3) = 12.06, p = .04, R^2(\text{adj}) 73.44\%$ ) with no significant correlation for other race ( $F(1, 3) = 1.88, p = .26, R^2(\text{adj}) 18.02\%$ ), black ( $F(1, 3) = 2.43, p = .22, R^2(\text{adj}) 26.32\%$ ), white ( $F(1, 3) = 8.27, p = .06, R^2(\text{adj}) 64.51\%$ ), or Hispanic or LatinX ( $F(1, 3) = 6.60, p = .08, R^2(\text{adj}) 58.35\%$ ).

For OAG trials, the trial year was statistically significantly correlated with increase in EID for Hispanic or LatinX ( $F(1, 4) = 26.10, p = .007, R^2(\text{adj}) 83.39\%$ ) with an decrease in EID for white ( $F(1, 4) = 15.60, p = .02, R^2(\text{adj}) 74.49\%$ ), with no significant correlation for other race ( $F(1, 4) = 0.83, p = .41, R^2(\text{adj}) -3.51\%$ ), Asian ( $F(1, 4) = 0.08, p = .80, R^2(\text{adj}) -22.63\%$ ), or black ( $F(1, 4) = 5.51, p = .08, R^2(\text{adj}) 47.45\%$ ).

**eTable: Comparison of racial/ethnic composition of trials leading to drug approval with the expected trial demographic distribution in the US based on published 5-Category Race/ethnic prevalence data**

|                                                                                                                                                                                                                     | 5-Category Race <sup>a</sup> |         |
|---------------------------------------------------------------------------------------------------------------------------------------------------------------------------------------------------------------------|------------------------------|---------|
|                                                                                                                                                                                                                     | Pearson's                    | P-value |
| brolucizumab-dbl (AMD)                                                                                                                                                                                              | 247.774                      | <.001   |
| aflibercept (AMD)                                                                                                                                                                                                   | 326.415                      | <.001   |
| ranibizumab (AMD)                                                                                                                                                                                                   | 220.011                      | <.001   |
| pegaptanib sodium (AMD)                                                                                                                                                                                             | 185.060                      | <.001   |
| verteporfin (AMD)                                                                                                                                                                                                   | 145.228                      | <.001   |
| unoprostone isopropyl (glaucoma).                                                                                                                                                                                   | 2.37E+02                     | <.001   |
| travoprost (glaucoma)                                                                                                                                                                                               | 541.759                      | <.001   |
| bimatoprost (glaucoma)                                                                                                                                                                                              | 107.566                      | <.001   |
| tafluprost (glaucoma)                                                                                                                                                                                               | 117.086                      | <.001   |
| latanoprostene bunod (glaucoma)                                                                                                                                                                                     | 34.665                       | <.001   |
| netarsudil (glaucoma)                                                                                                                                                                                               | 42.1577                      | <.001   |
| <sup>a</sup> Pearson's coefficient calculated as the difference between trial composition and the expected composition based on published prevalence (Stein et al. 2011, Vanderbeek et al. 2011) and US Census data |                              |         |

**eFigure 1: Enrollment Incidence Disparity (EID) and Enrollment Incidence Ratio (EIR) for each pharmaceutical agent relative to expected NEI prevalence rates.**

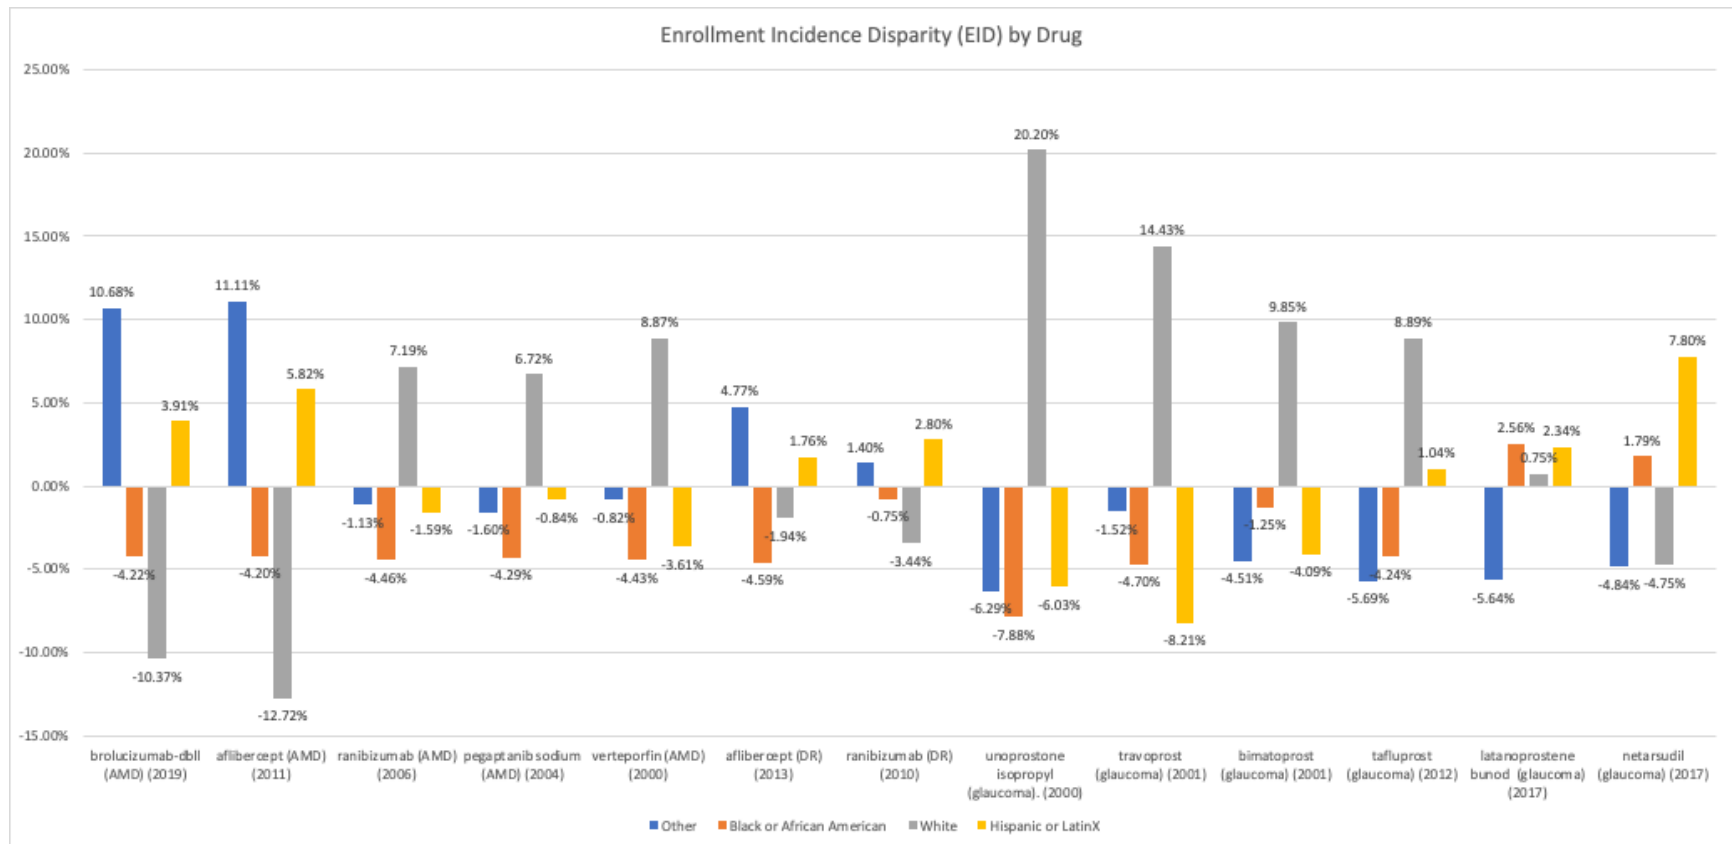

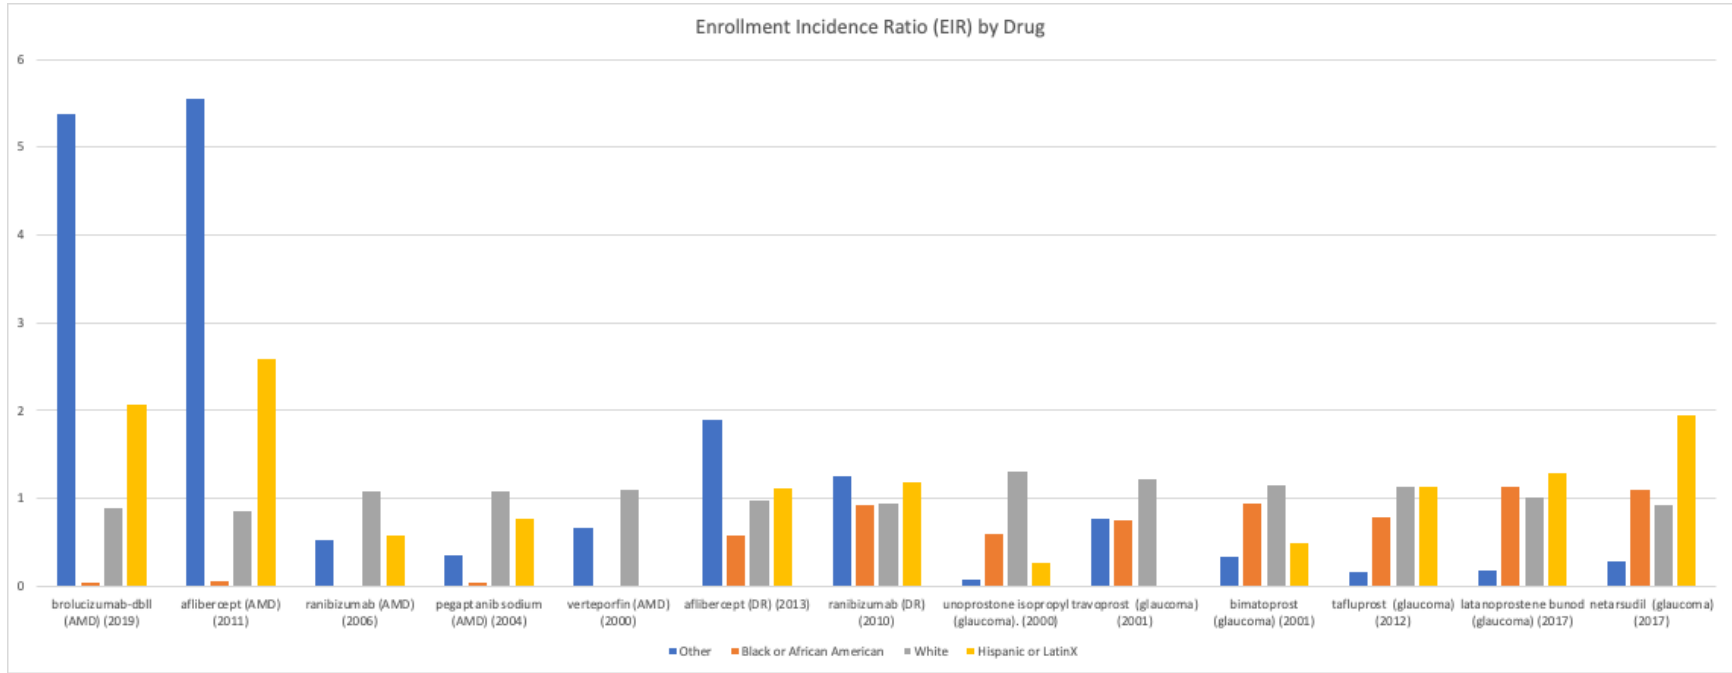

**eFigure 2: Enrollment Incidence Disparity (EID) and Enrollment Incidence Ratio (EIR) for each pharmaceutical agent relative to expected prevalence from Stein et al. 2011, Vanderbeek et al. 2011, and US Census data**

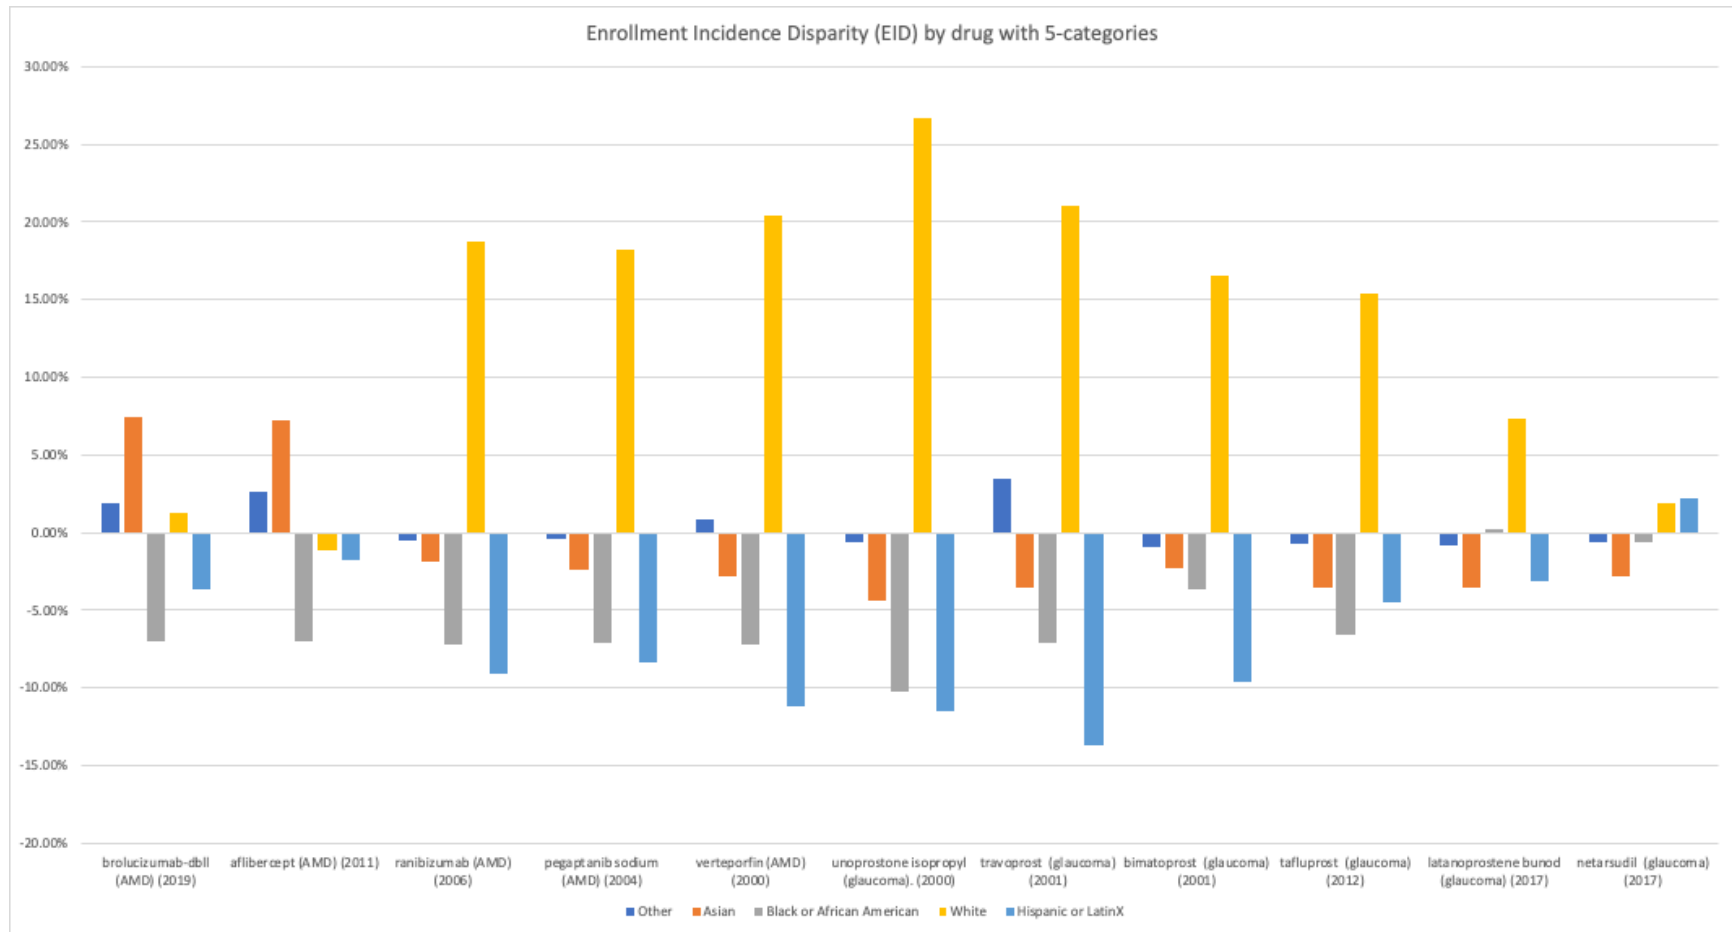

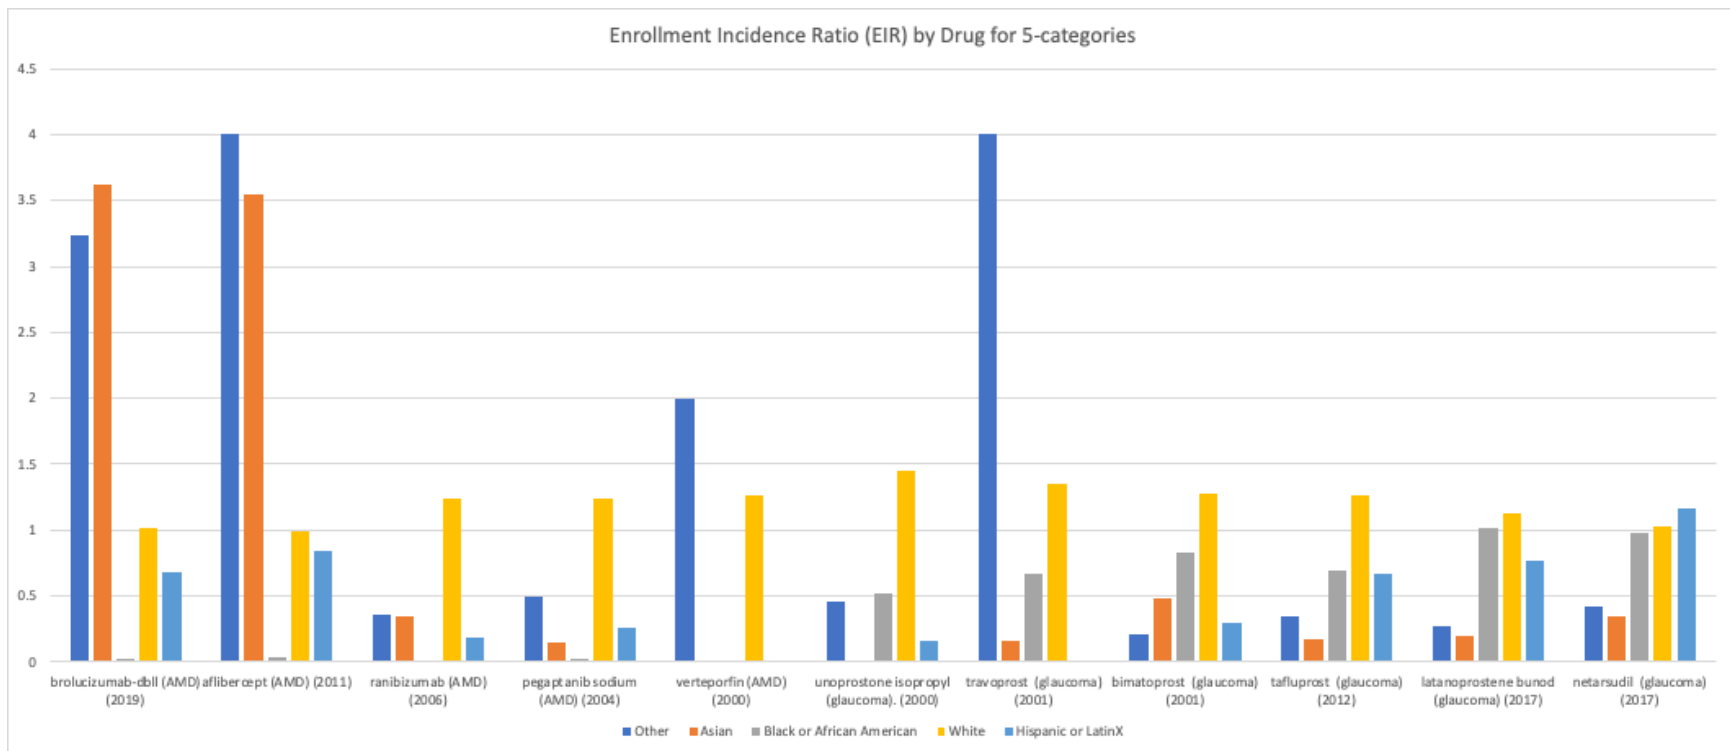

Supplement: jamaophthalmol-e210857-s001.pdf [file jamaophthalmol-e210857-s001.pdf]
